# Supplementary material
Source: PubMed Central journal article supplement (PMC2664612)

## **Supporting Information**

### **Identification of Proteins Adducted by Lipid Peroxidation Products in Plasma and Modifications of Apolipoprotein A1 with a Novel Biotinylated Probe**

Matthew E. Szapacs, Hye-Young H. Kim, Ned A. Porter and Daniel C. Liebler

Departments of Biochemistry and Chemistry, Vanderbilt University, Nashville, Tennessee

37232-0146.

Table S1 and S2

Figure S1 and S2

**Table S1.** ω-end electrophile adducts found in ApoA1 from plasma supplemented with PLPBSO

| sequences      | positions        | mass shifts |     |    |    |
|----------------|------------------|-------------|-----|----|----|
|                |                  | 126         | 112 | 98 | 84 |
| VK*DLATVYVDVLK | K12              | x           |     |    | x  |
| DLEEVK*AK      | K94              | x           | x   |    | x  |
| AK*VQPYLDDFQK  | K96              | x           |     | x  | x  |
| K*WQEEMELYR    | K107             | x           |     | x  | x  |
| QK*VEPLR       | K118             |             | x   |    |    |
| QK*LH*ELQEK    | K133 or<br>/H135 | x           |     |    |    |
| LH*ELQEK       | H135             | x           |     |    |    |
| AH*VDALR       | H155             |             | x   | x  | x  |
| TH*LAPYSDELRL  | H162             |             | x   | x  | x  |
| LAEYH*AK       | H193             | x           |     | x  |    |
| AK*PALEDLR     | K208             | x           |     | x  | x  |

Mass shifts: 126: nonanal, 112: octanal, 98: heptanal, 84: hexanal  
x: found

**Table S2.** Complete list of proteins identified from plasma following supplementation and oxidation in the presence of PLPBSO, affinity purification and base hydrolysis.

| Protein name                                           | Accession #    | Average % Coverage |
|--------------------------------------------------------|----------------|--------------------|
| 163 kDa protein                                        | IPI00465313.2  | 19.60%             |
| ALB protein                                            | IPI00216773.4  | 58.60%             |
| Alpha-1-antitrypsin precursor                          | IPI00553177.1  | 26.90%             |
| Apolipoprotein A-I precursor                           | IPI000218541.1 | 68.30%             |
| Apolipoprotein A-II precursor                          | IPI00021854.1  | 49.00%             |
| Apolipoprotein A-IV precursor                          | IPI00304273.1  | 34.40%             |
| Apolipoprotein B-100 precursor                         | IPI00022229.1  | 5.00%              |
| Apolipoprotein D precursor                             | IPI00006662.1  | 18.50%             |
| Apolipoprotein E precursor                             | IPI00021842.1  | 30.60%             |
| Apolipoprotein C-III precursor                         | IPI00021857.1  | 19.20%             |
| Beta-globin gene from a thalassemia patient            | IPI00382950.1  | 15.50%             |
| Complement C3 precursor                                | IPI00164623.4  | 24.80%             |
| Complement C4-A precursor                              | IPI00032258.4  | 8.60%              |
| Factor VII active site mutant immunoconjugate          | IPI00382606.1  | 5.30%              |
| Fibrinogen beta chain precursor                        | IPI00298497.3  | 18.00%             |
| Ig gamma-2 chain C region                              | IPI00399007    | 6.30%              |
| Ig mu heavy chain disease protein                      | IPI00385264.1  | 13.50%             |
| Inter-alpha-trypsin inhibitor heavy chain H1 precursor | IPI00292530.1  | 9.80%              |
| Inter-alpha-trypsin inhibitor heavy chain H2 precursor | IPI00305461    | 10.20%             |
| Serum amyloid A-4 protein precursor                    | IPI00019399.1  | 24.60%             |
| Serum paraoxonase/arylesterase 1                       | IPI00218732.2  | 17.20%             |

**Figure S1.** Total ion current LC-MS trace of peptides from a tryptic digest of oxidized plasma supplemented with PLPBSO (A) and oxidized, unsupplemented plasma (B). Plasma was supplemented with PLPBSO and then incubated with the free radical initiator AIPH as described under Experimental Procedures. After oxidation, biotinylated (PLPBSO-adducted) plasma proteins were captured on streptavidin-agarose, digested and analyzed by LC-MS. Very little non-specific binding was detected in the control sample (B).

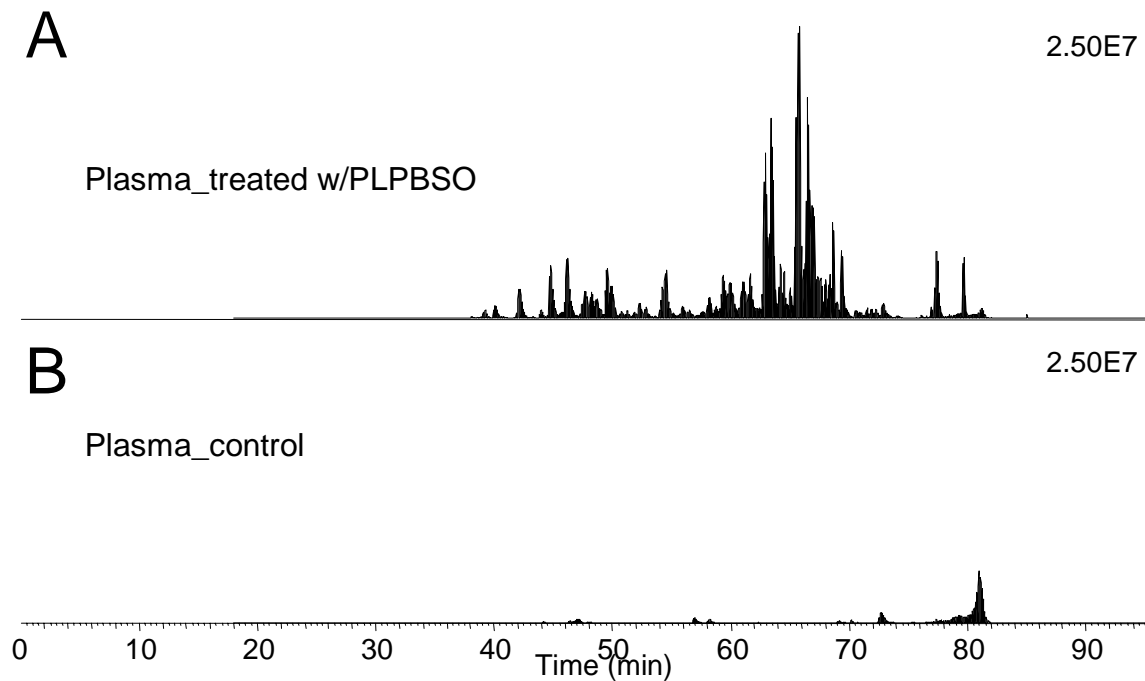

**Figure S2.** MS-MS spectra of ApoA1 adducts formed with PLPBSO oxidation products or HNE.

a. KODA (M+210) adduct of ApoA1 peptide QLNL\*K<sup>45</sup>LLDNWDSVTSTFSK

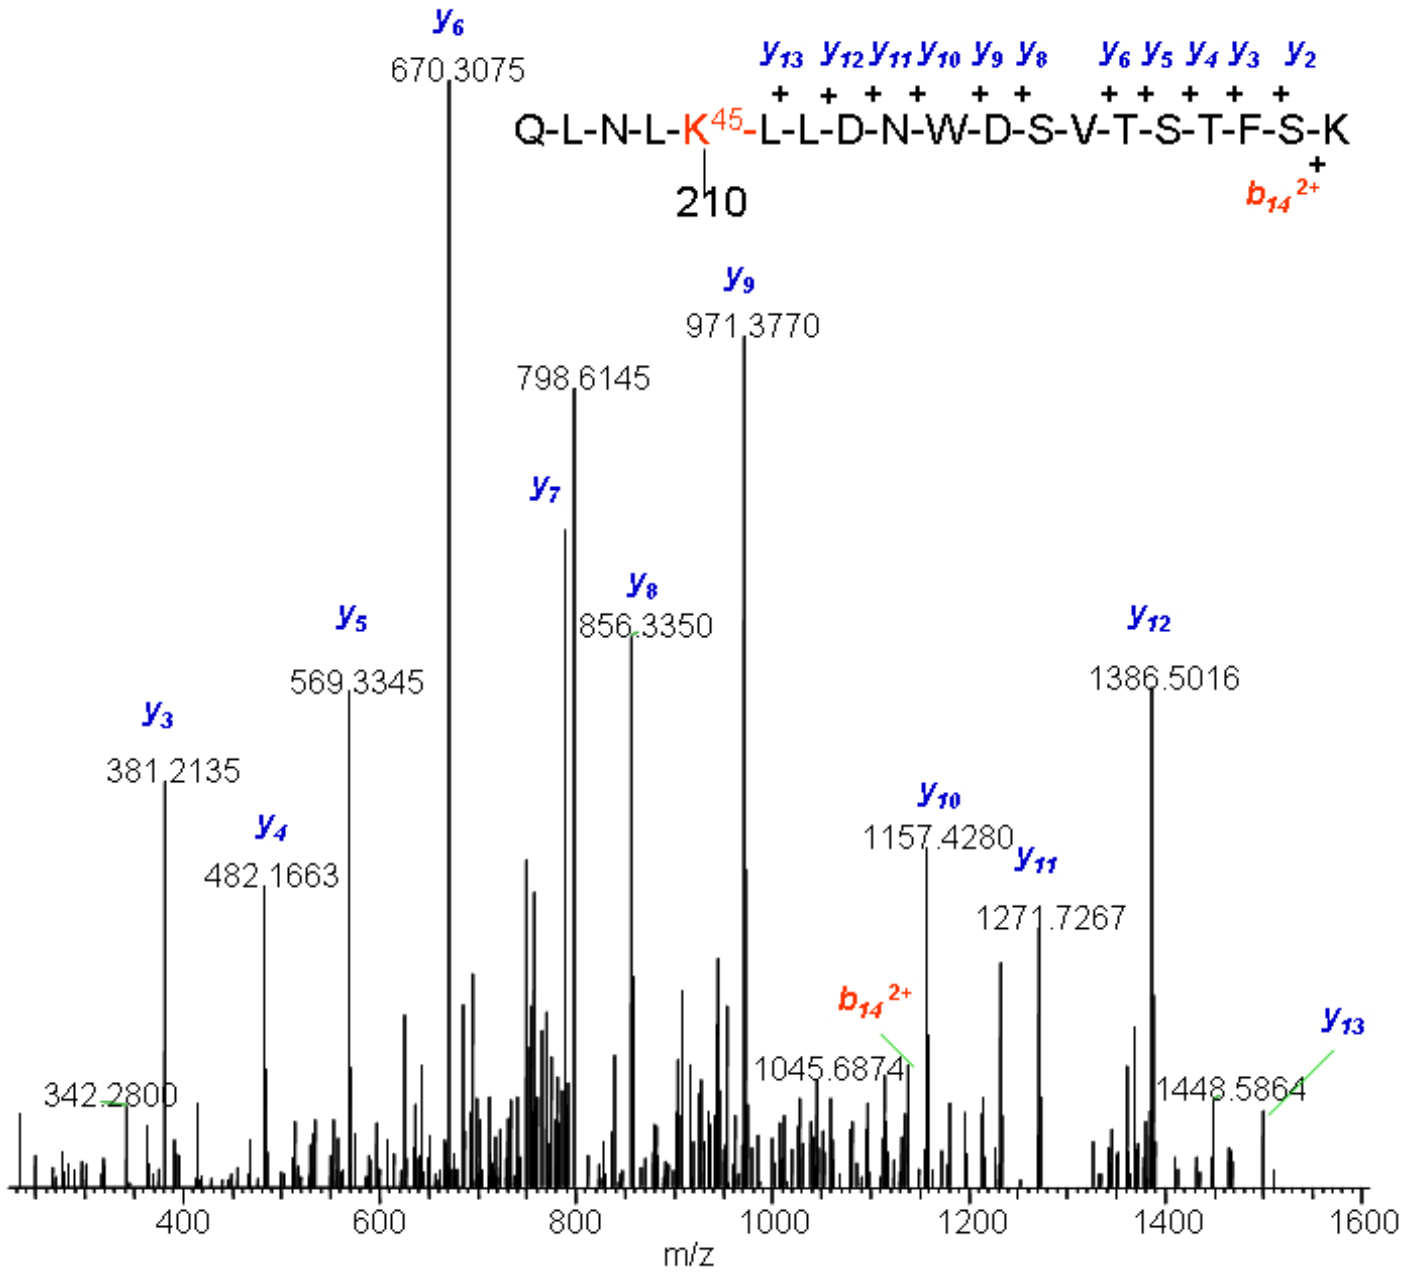

b. HODA (M+228) non-reduced Michael adduct of ApoA1 peptide

A\*H<sup>155</sup>VDALRTHLAPYSDEL R

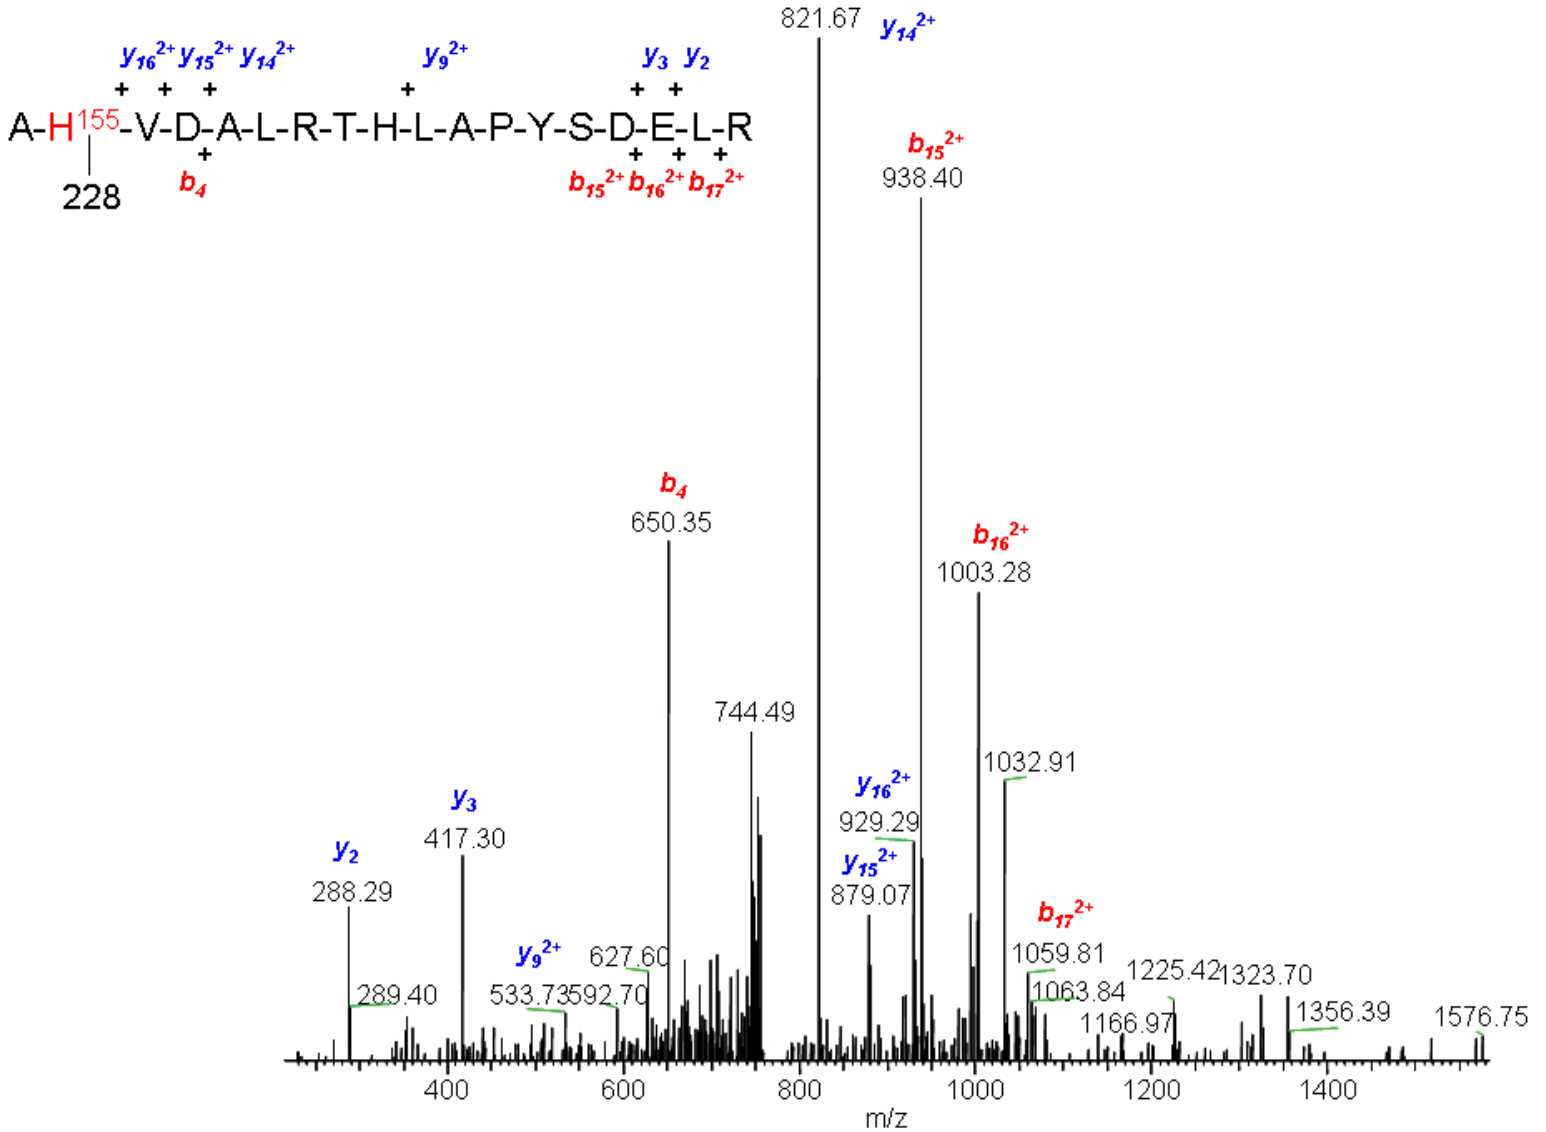

c. 7-oxooctanoic acid imine adduct (M + 128) of ApoA1 peptide LEAL\*K<sup>182</sup>ENGGAR

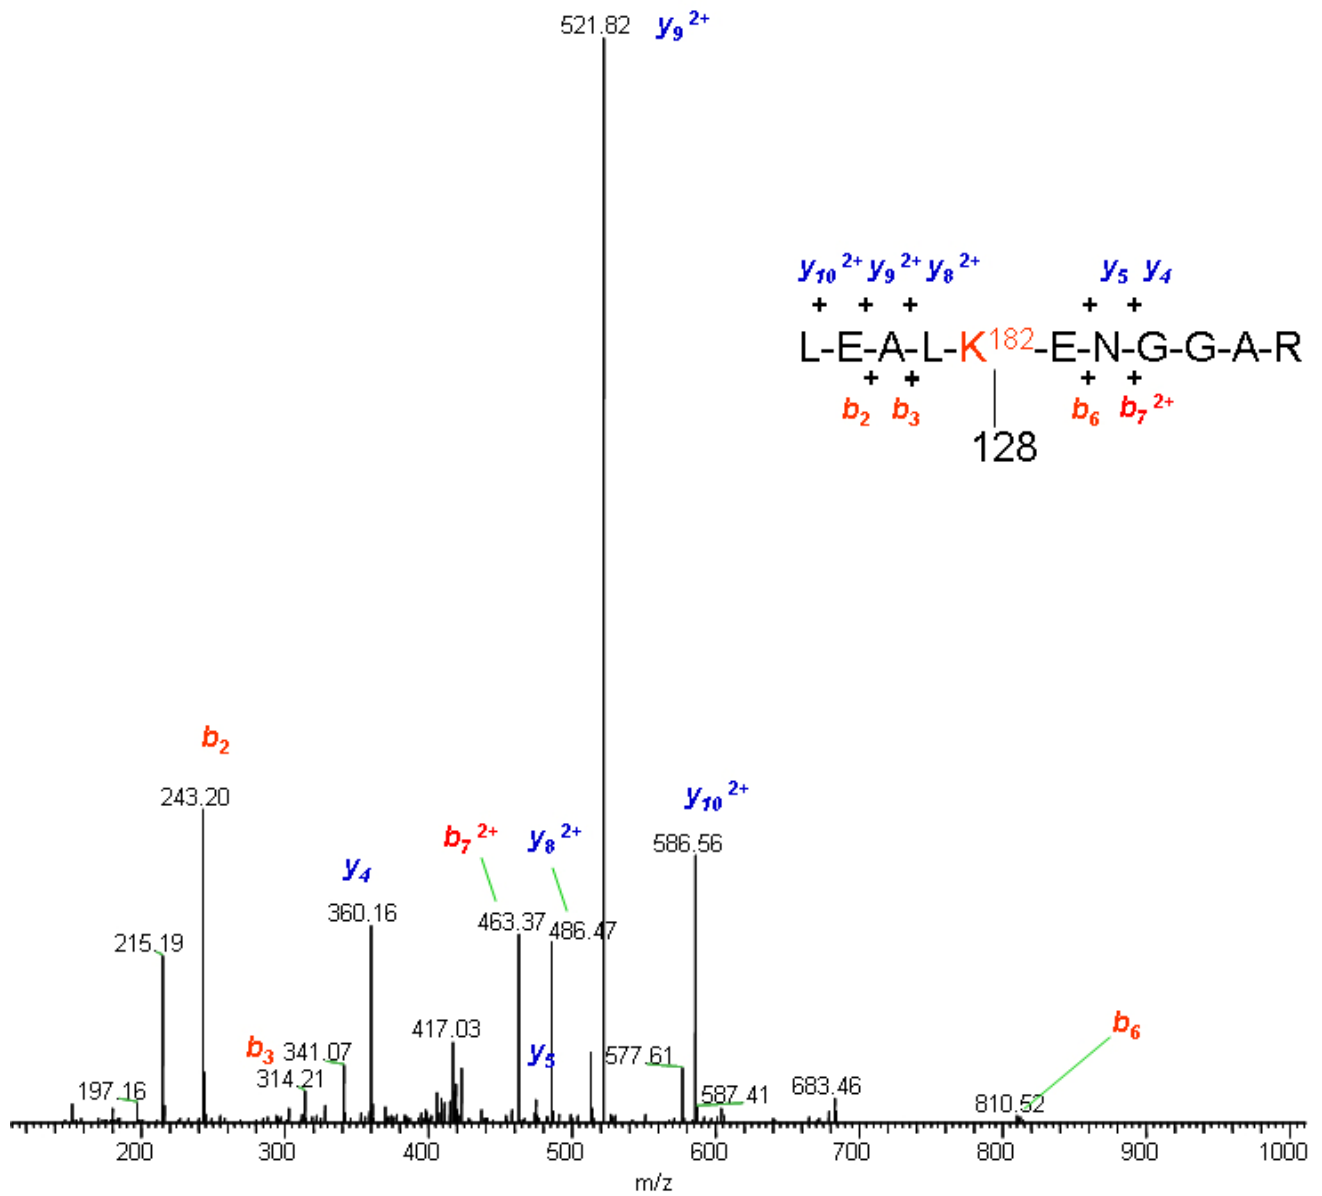

d. HODA (M+156) 9-oxononanoic acid imine adduct of ApoA1 peptide

LAEYHA\*K<sup>195</sup>ATEHLSTLSEK

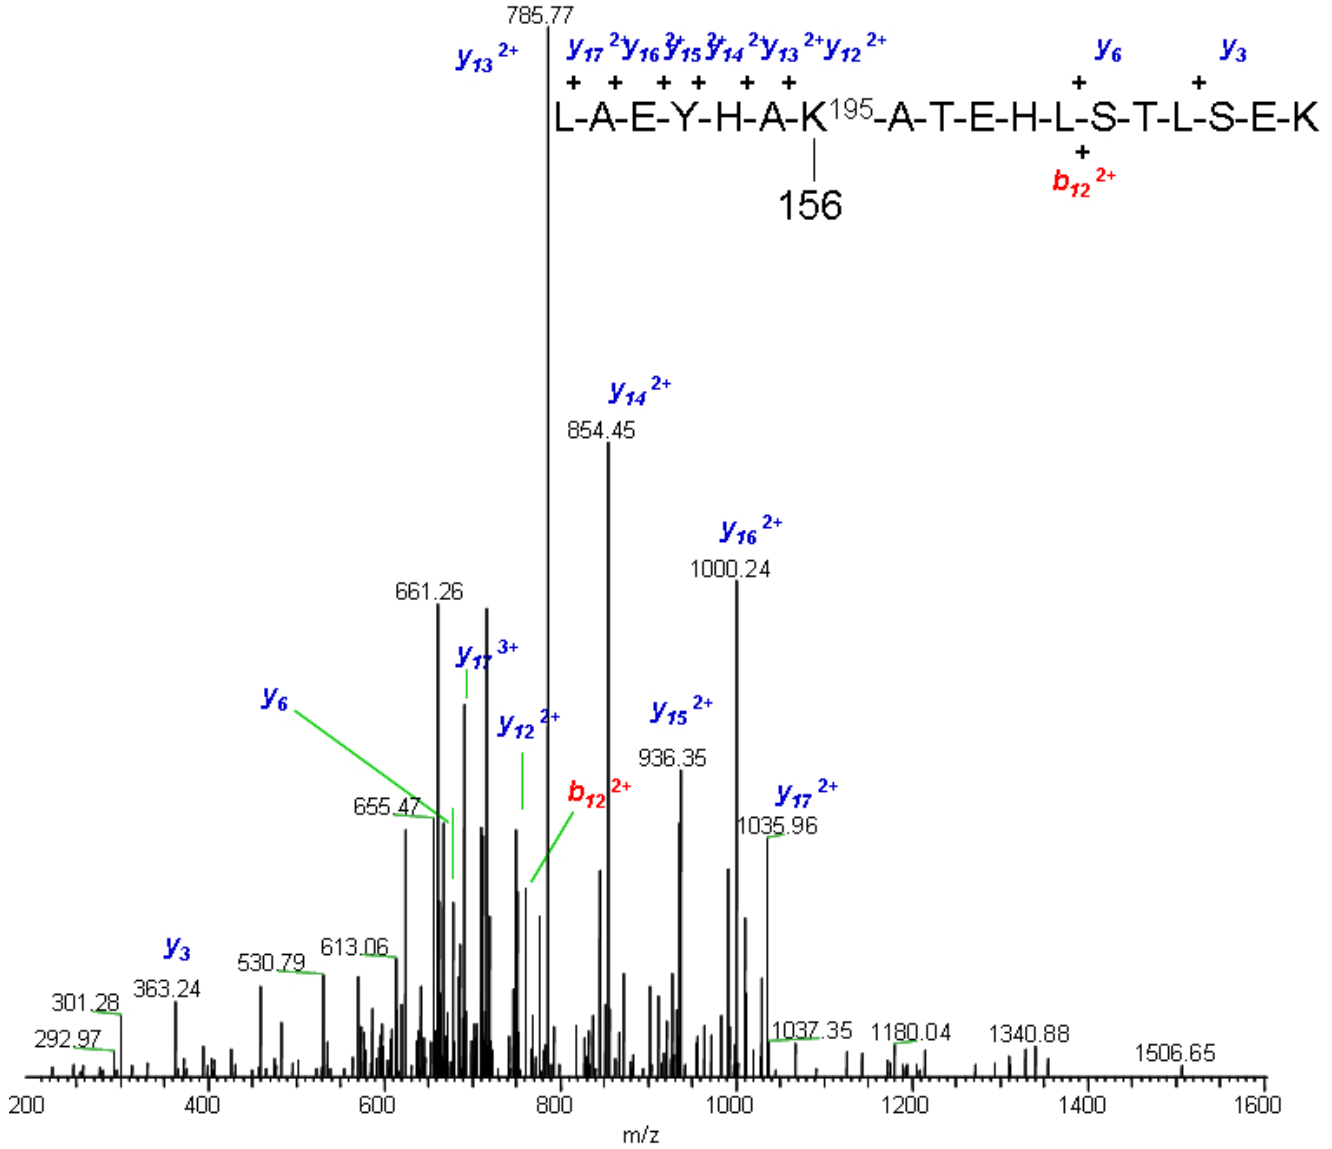



e. HNE (M+158) reduced Michael adduct of ApoA1 peptide V\*K<sup>12</sup>DLATVYVDVLK

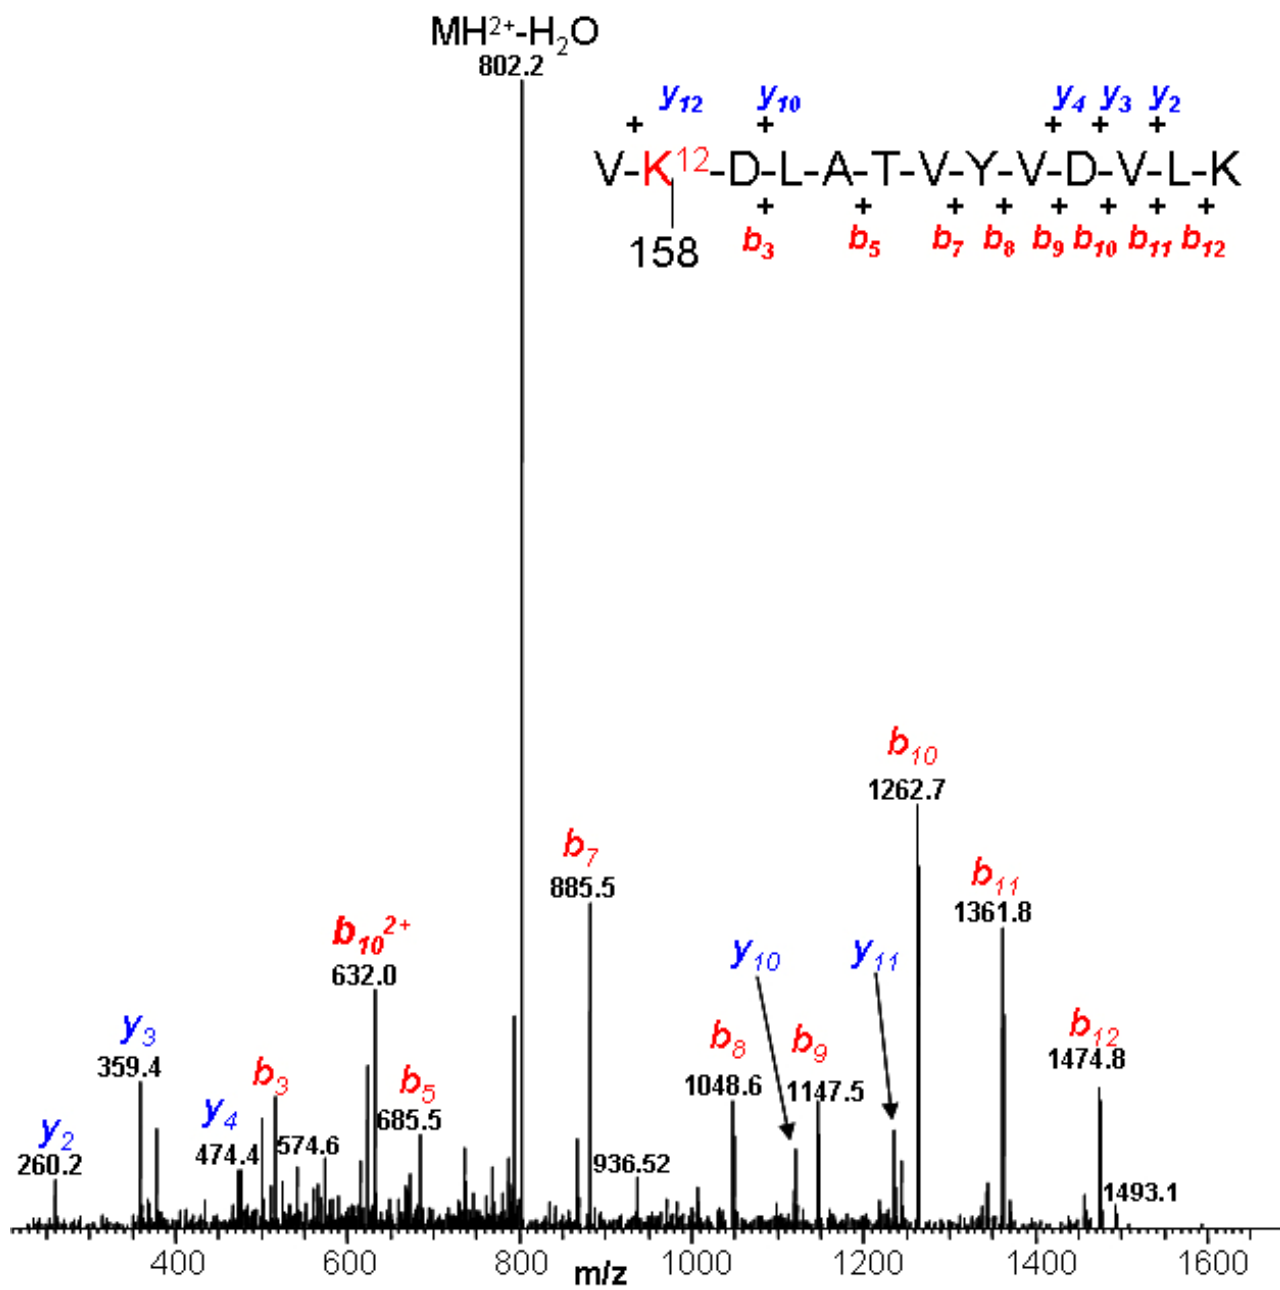

f. HNE (M+158) reduced Michael adduct of ApoA1 peptide DLATVYVDVL\*K<sup>23</sup>DSGR

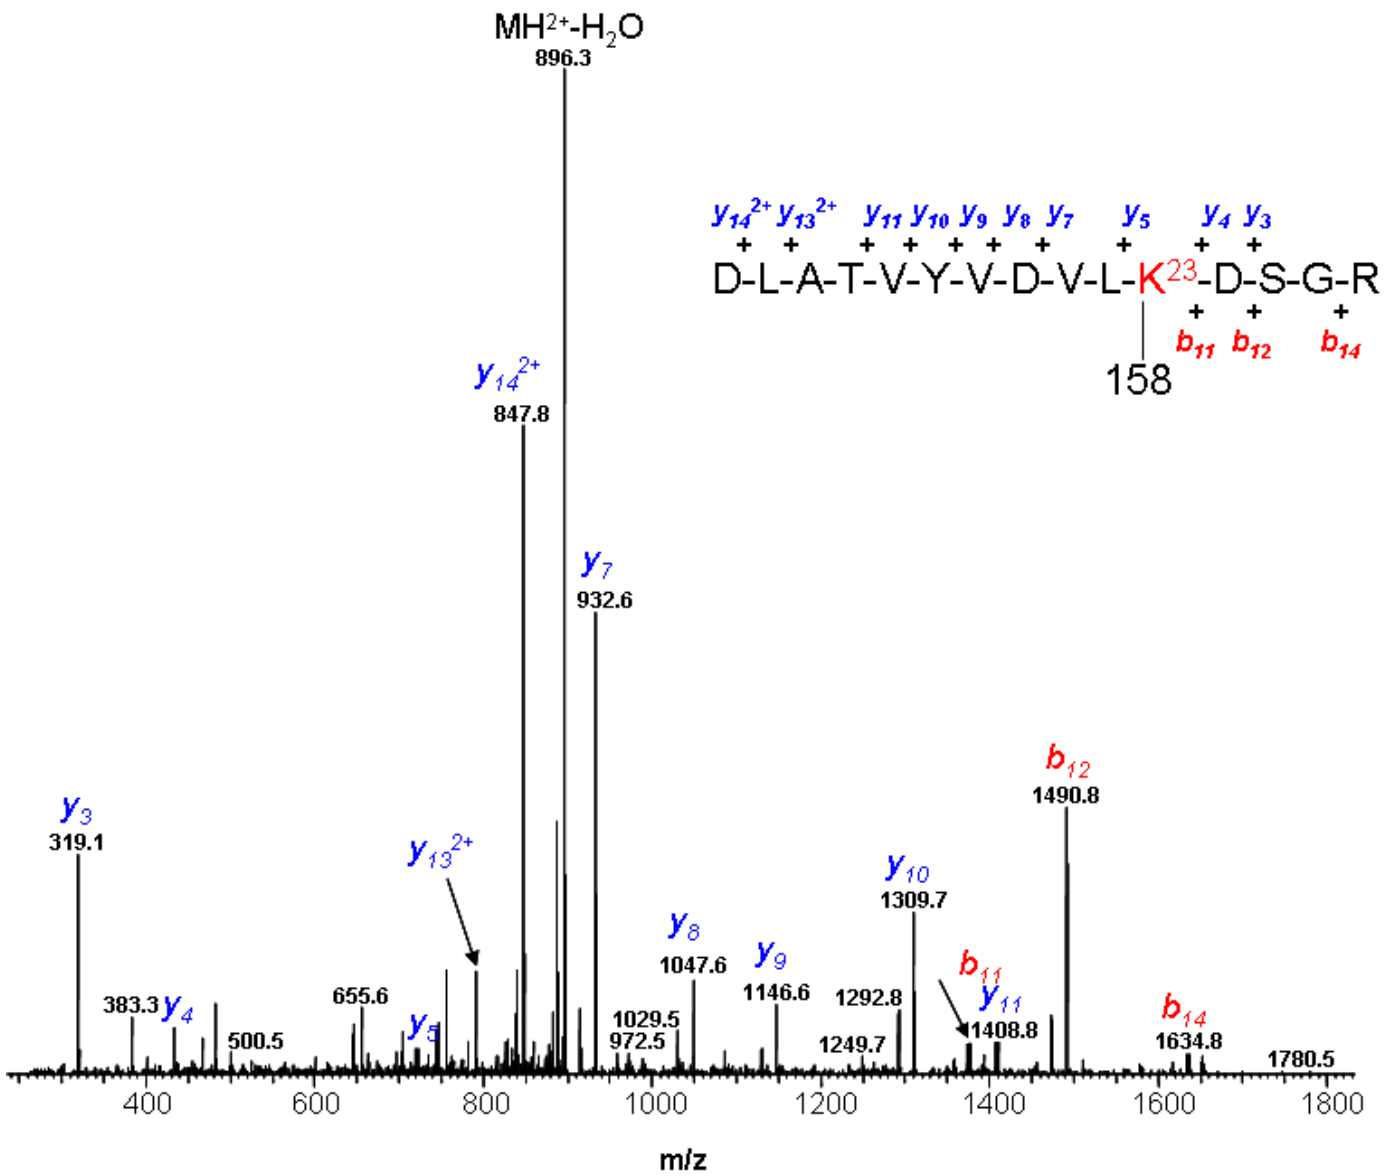

g. HNE (M+158) reduced Michael adduct of ApoA1 peptide DLEEV\*K<sup>94</sup>AK

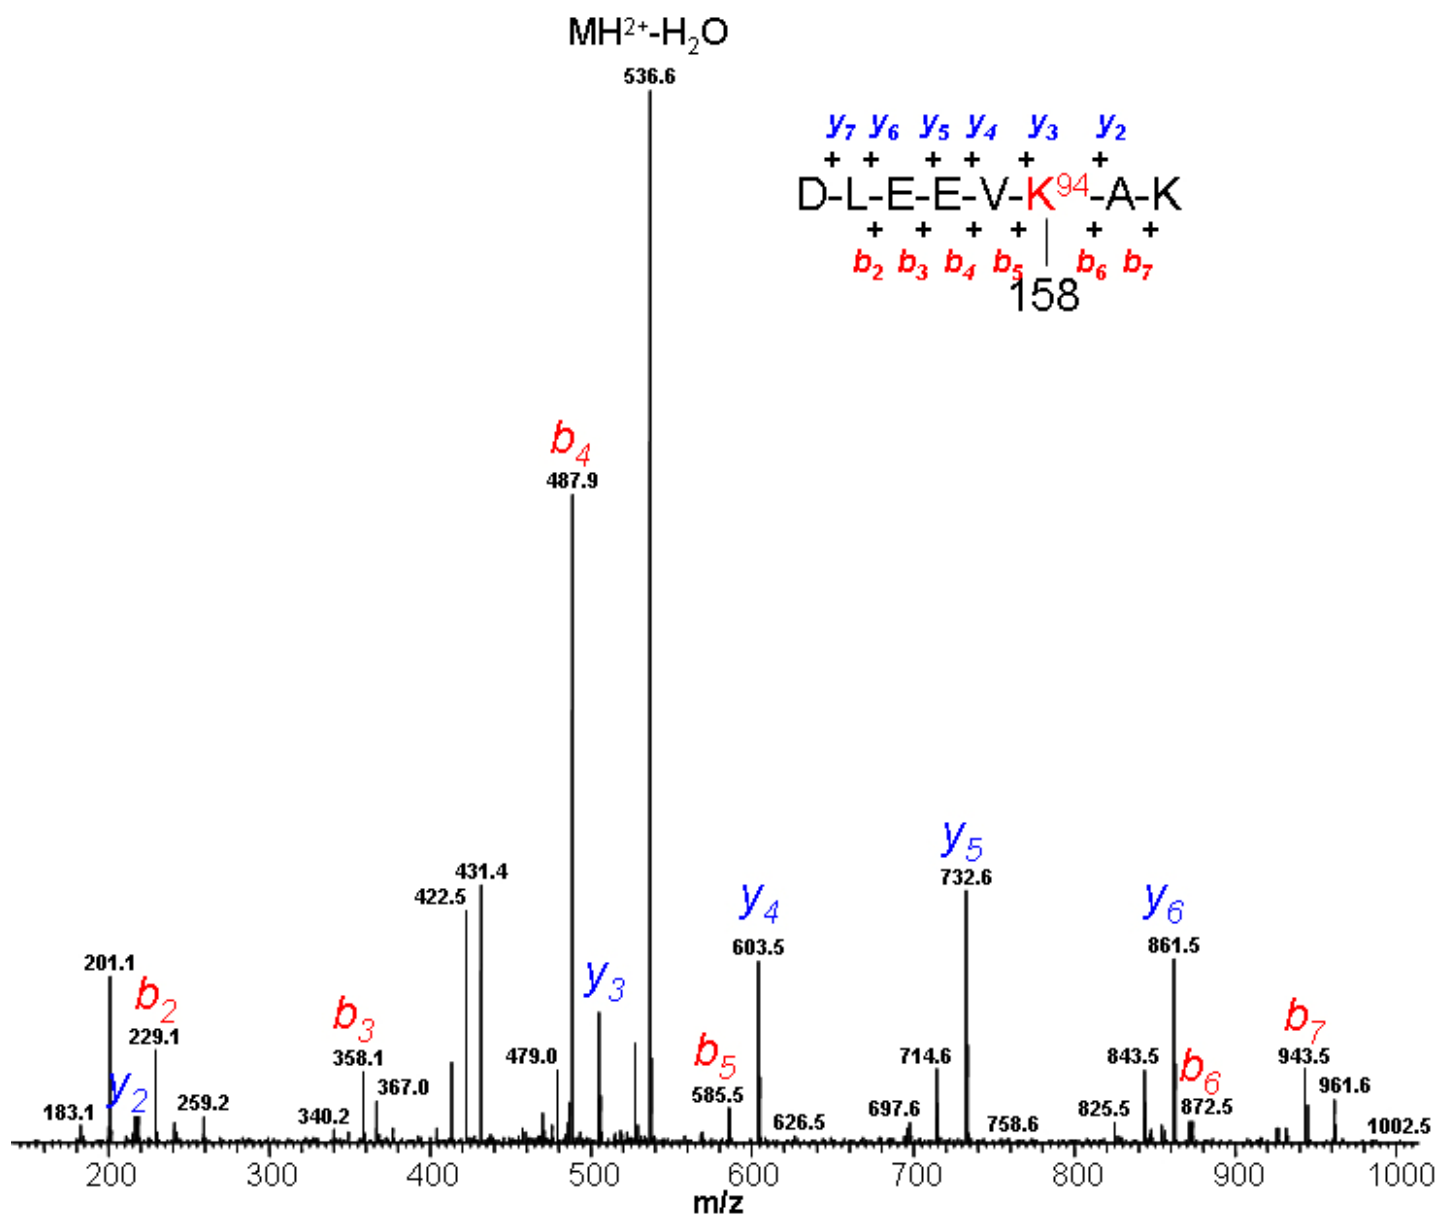

h. HNE (M+158) reduced Michael adduct of ApoA1 peptide A\*K<sup>96</sup>VQPYLDDFQK

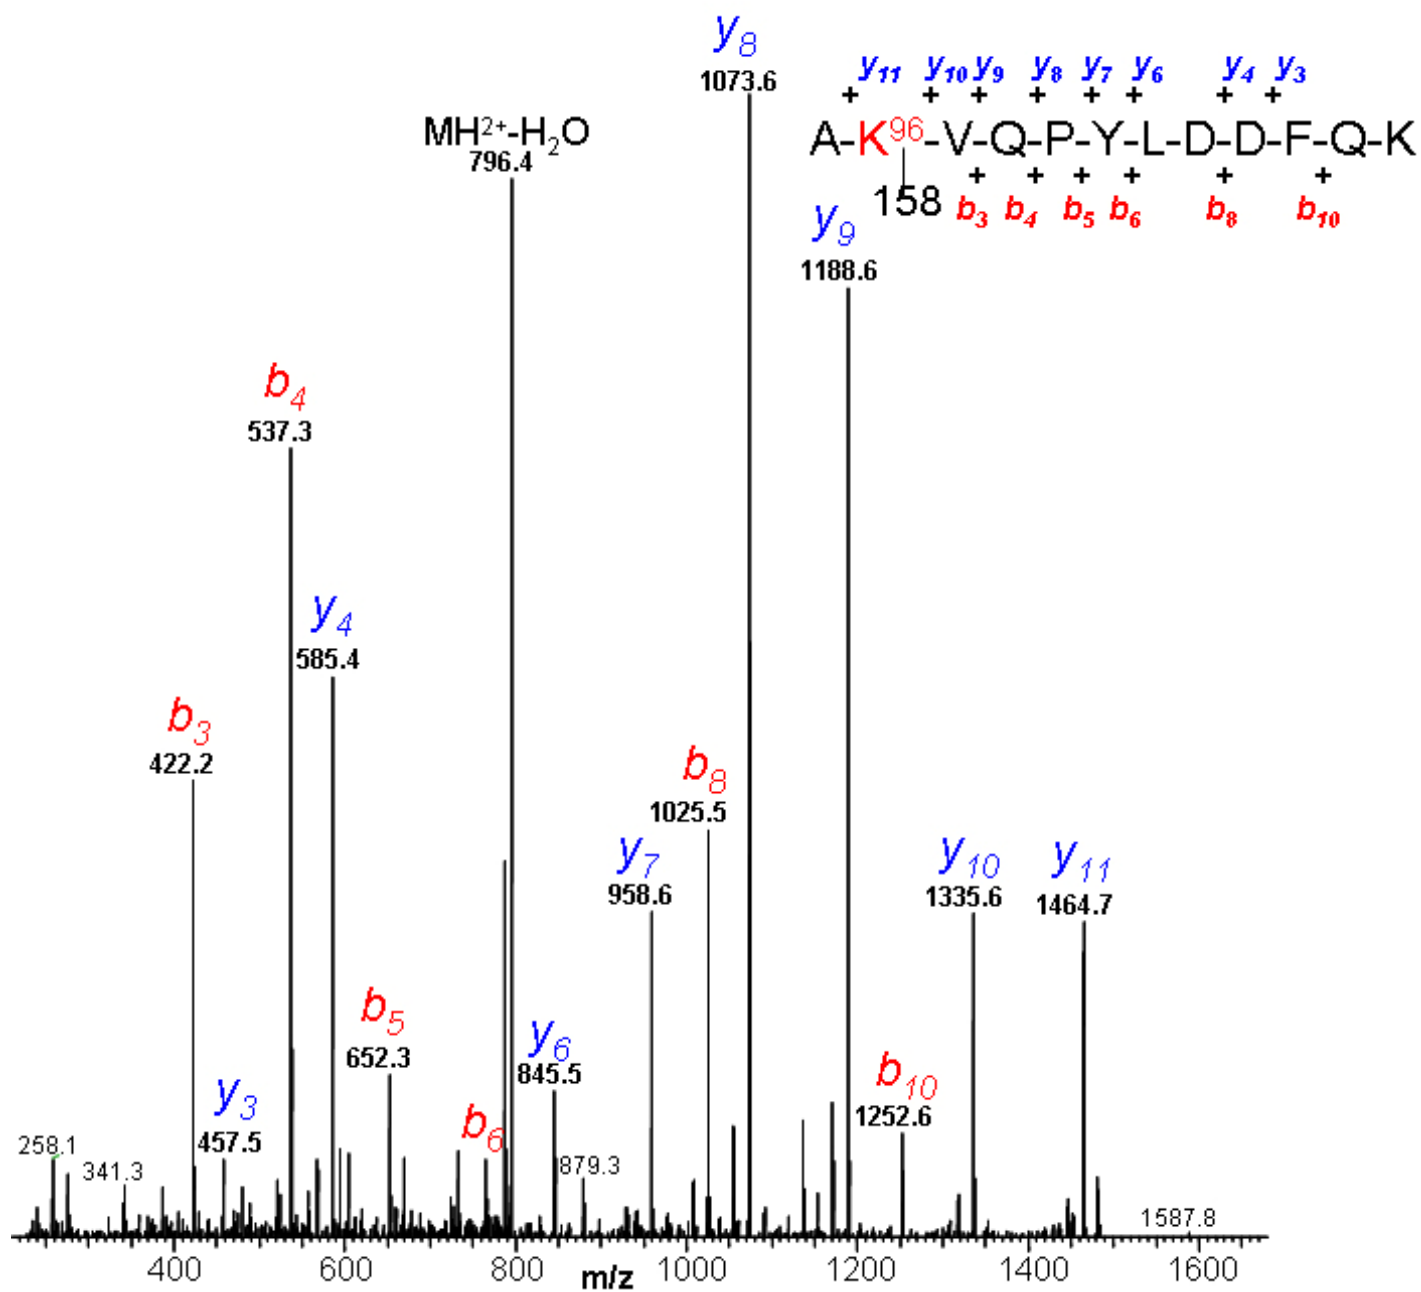

i. HNE (M+158) reduced Michael adduct of ApoA1 peptide \*K<sup>107</sup>WQEEMELYR

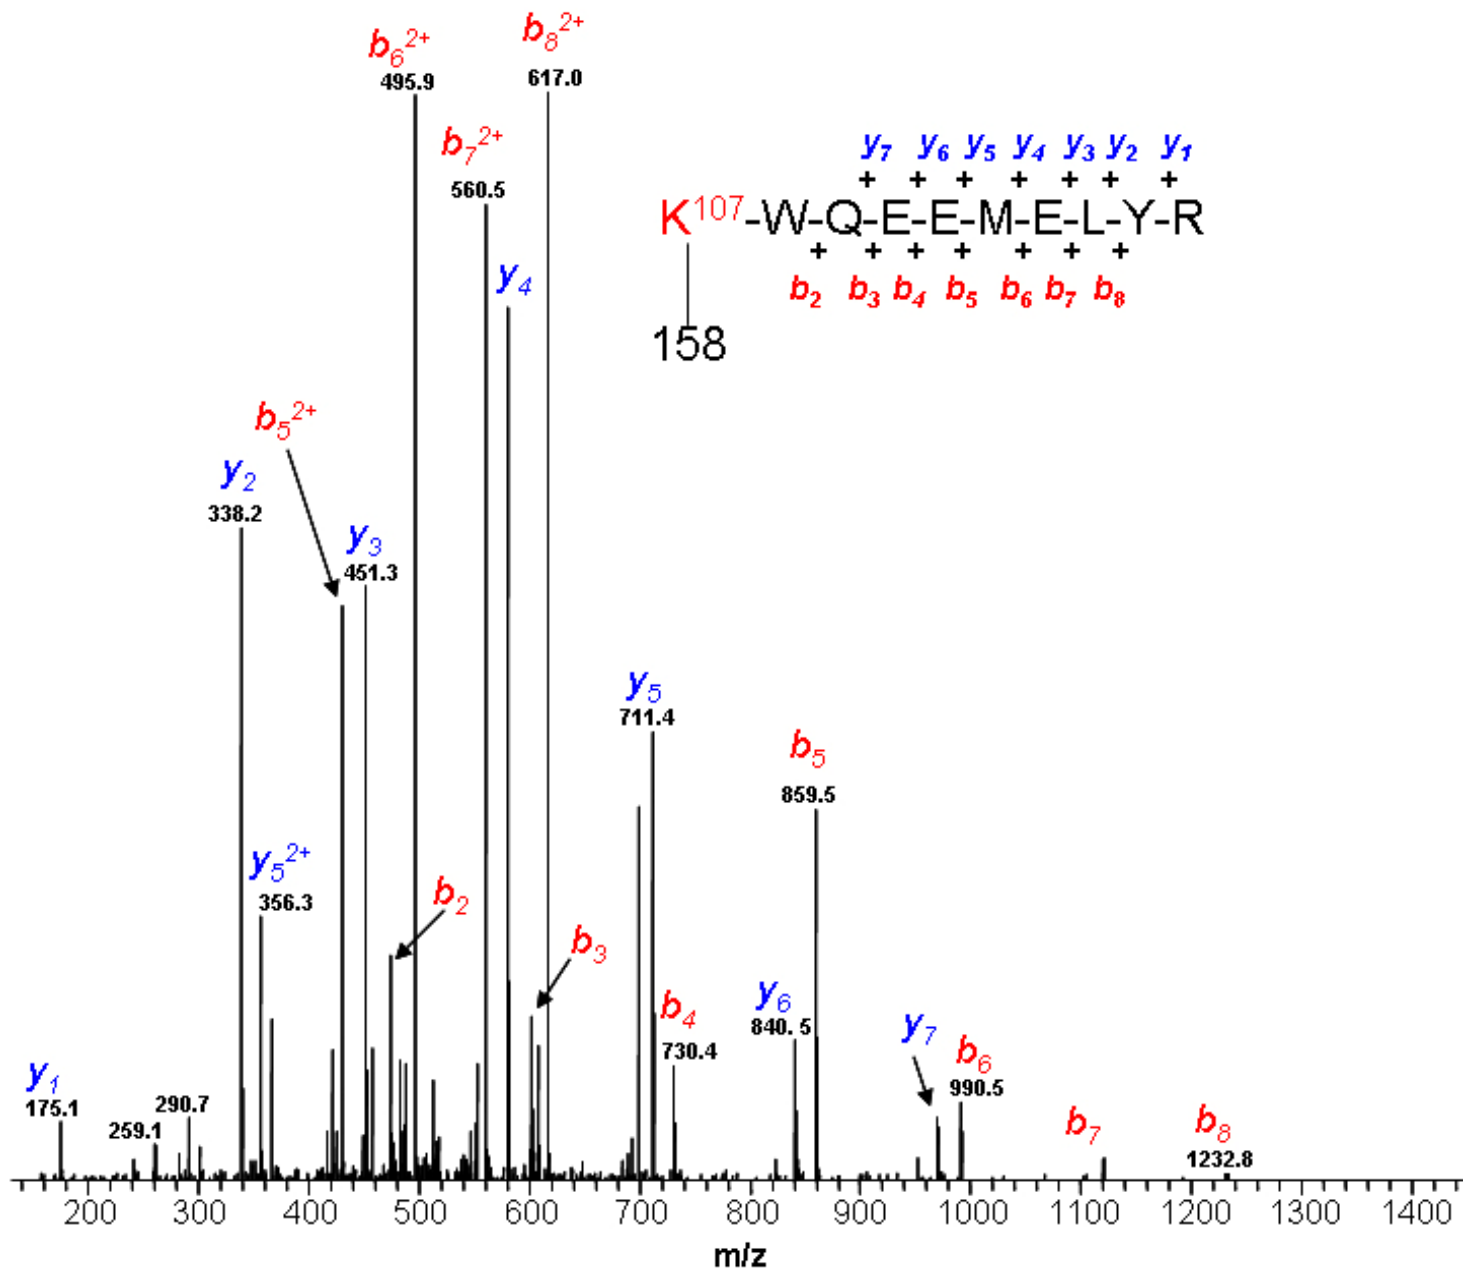

j. HNE (M+158) reduced Michael adduct of ApoA1 peptide L\*H<sup>135</sup>ELQEK

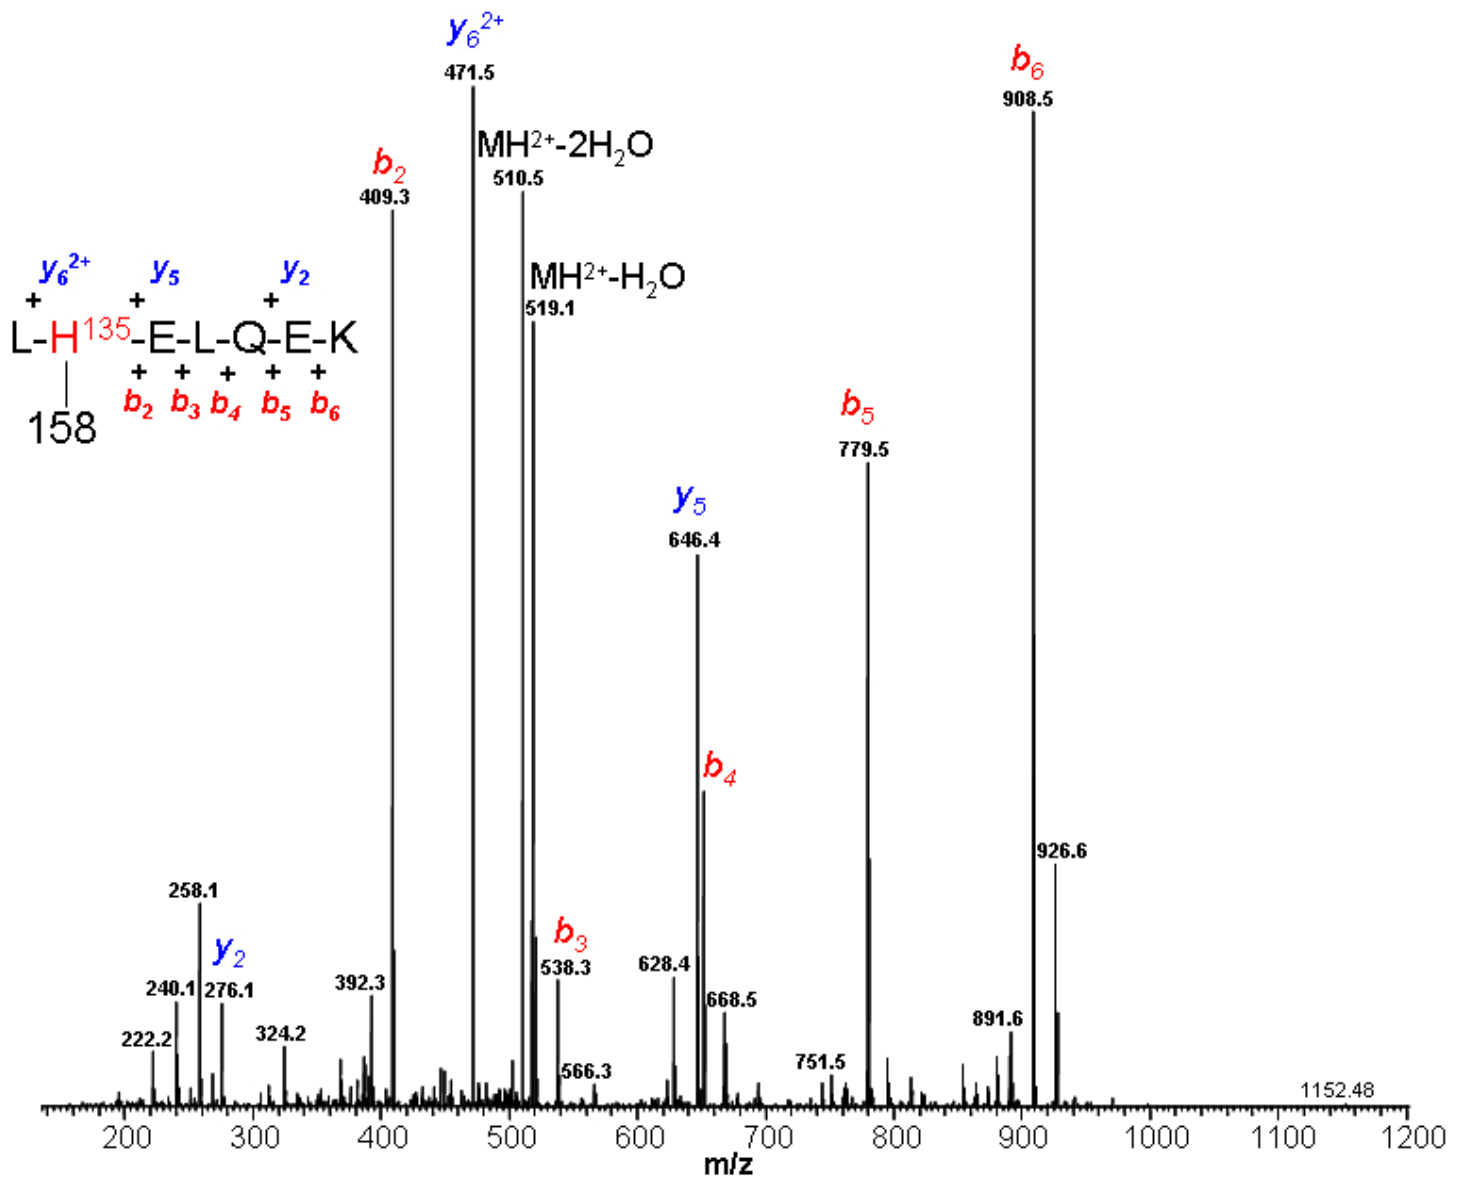

k. HNE (M+158) reduced Michael adduct of ApoA1 peptide A\*H<sup>155</sup>VDALR

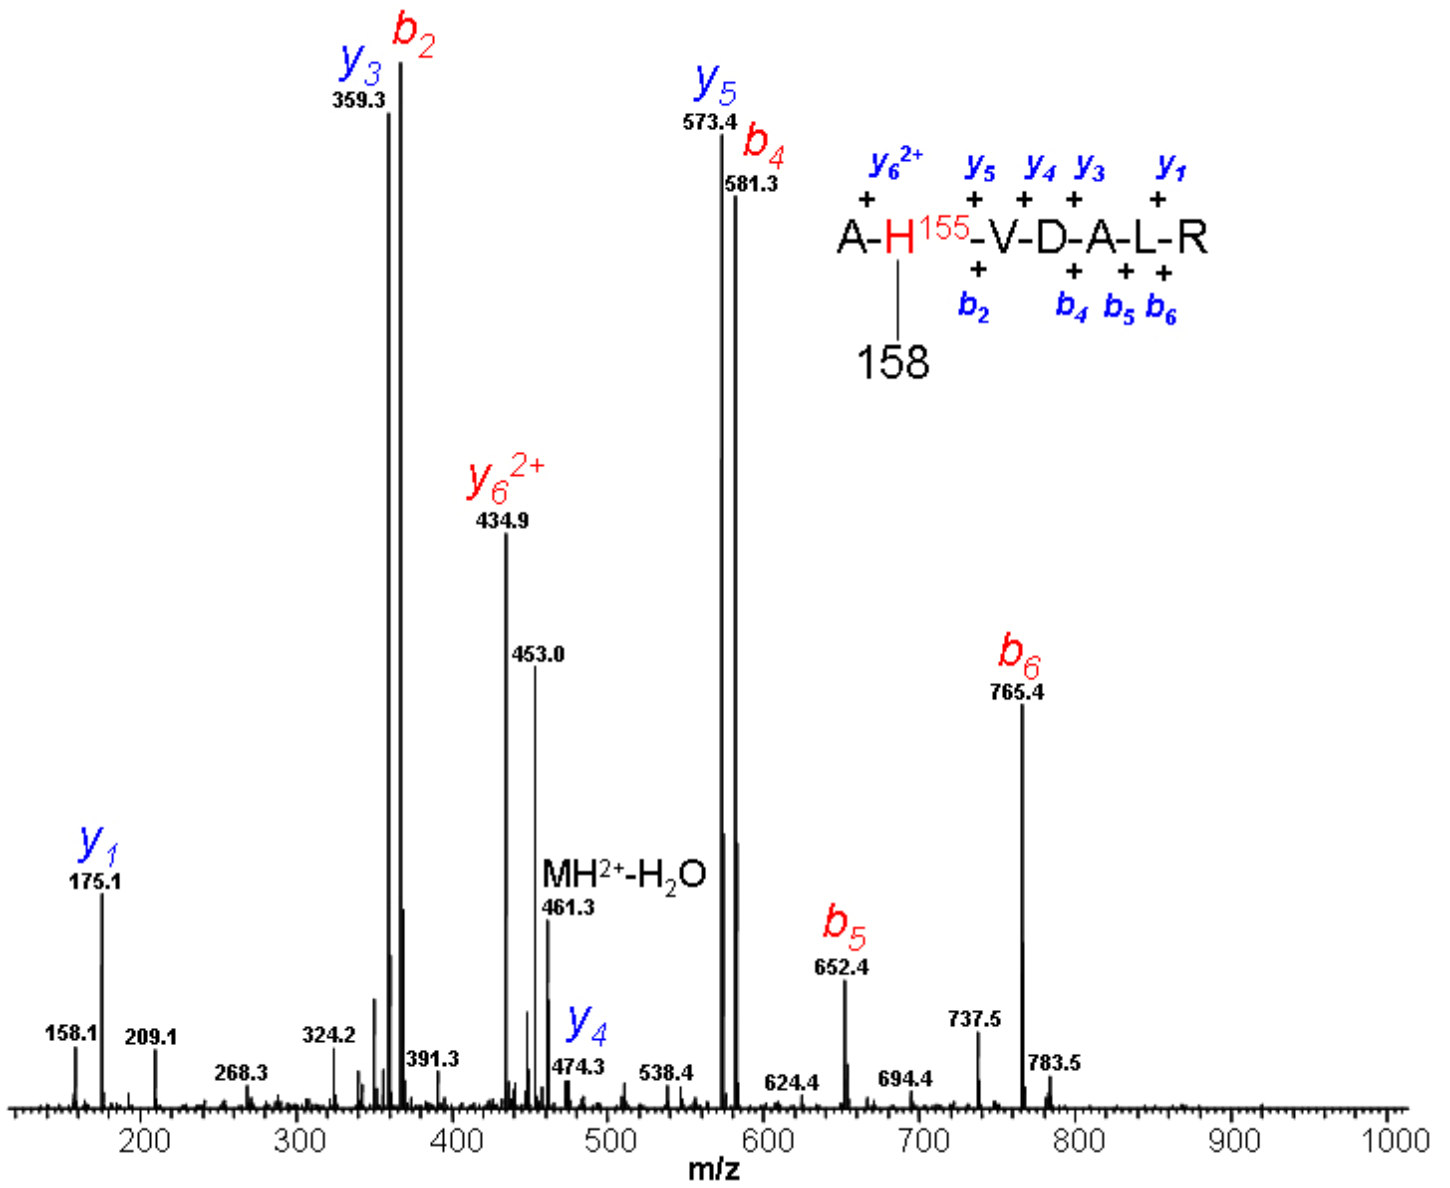

1. HNE (M+158) reduced Michael adduct of ApoA1 peptide LAEY\*H<sup>193</sup>AK

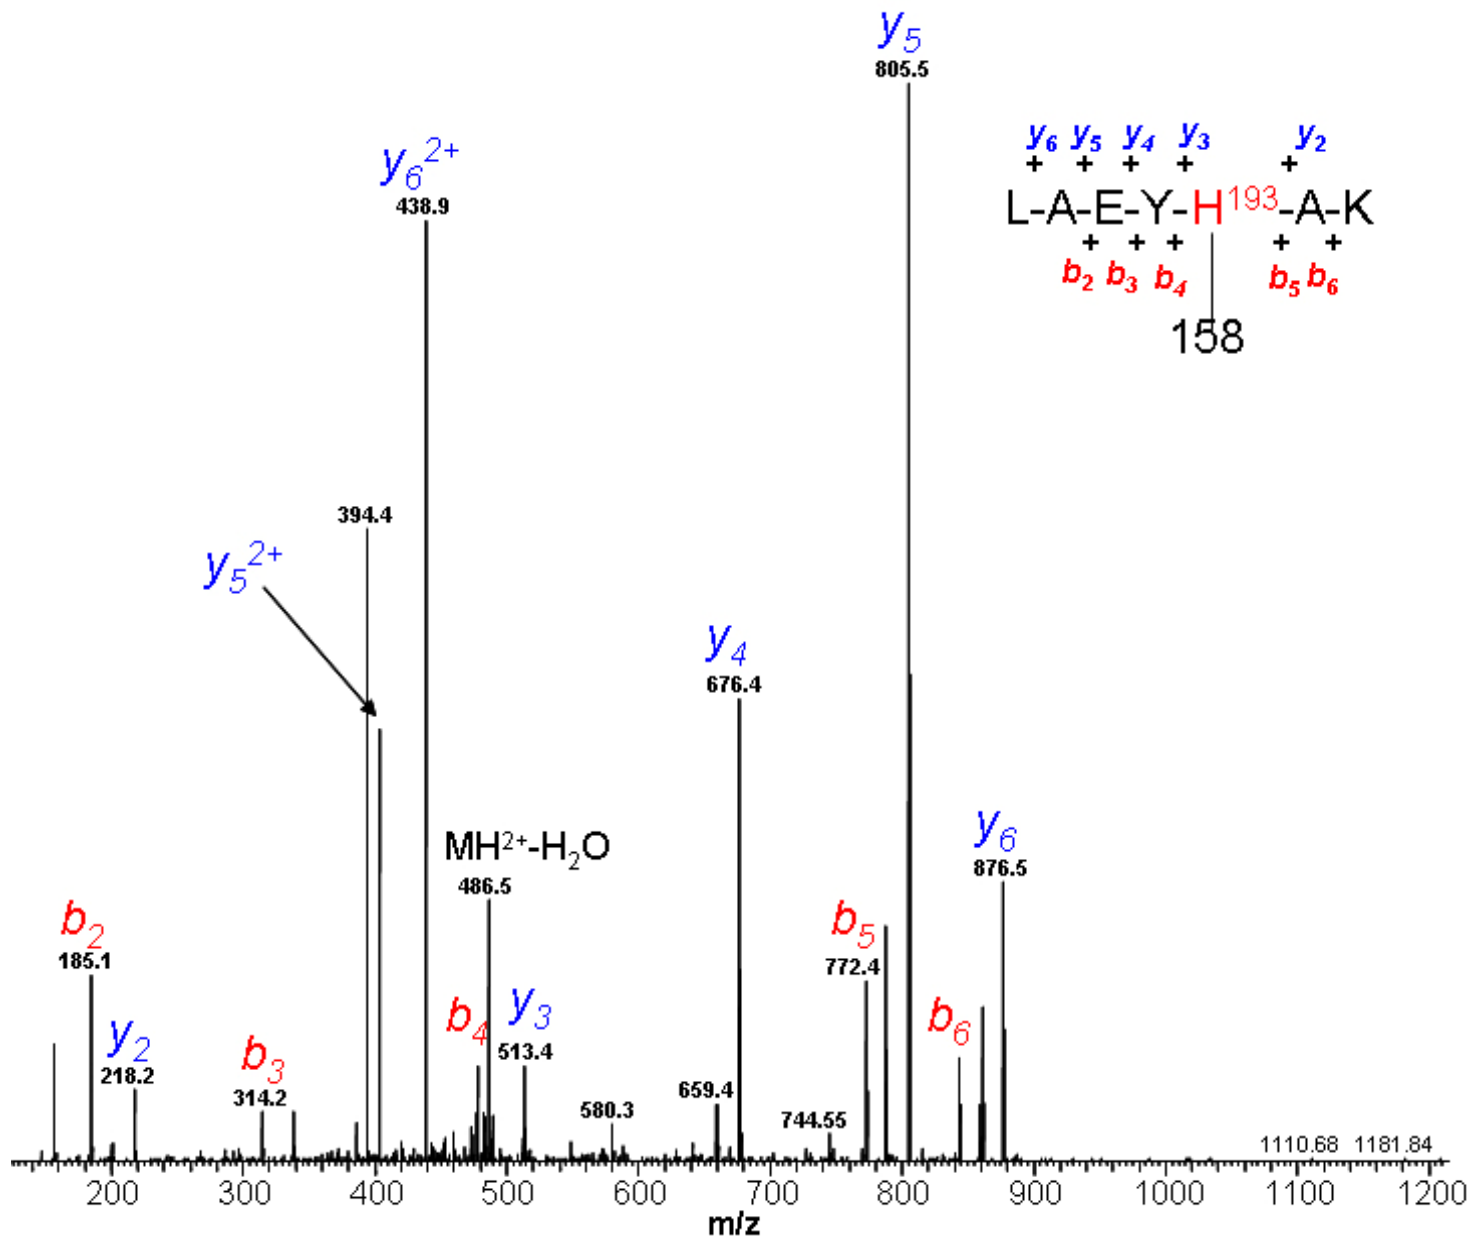



m. HNE (M+158) reduced Michael adduct of ApoA1 peptide ATE\*H<sup>199</sup>LSTLSEK

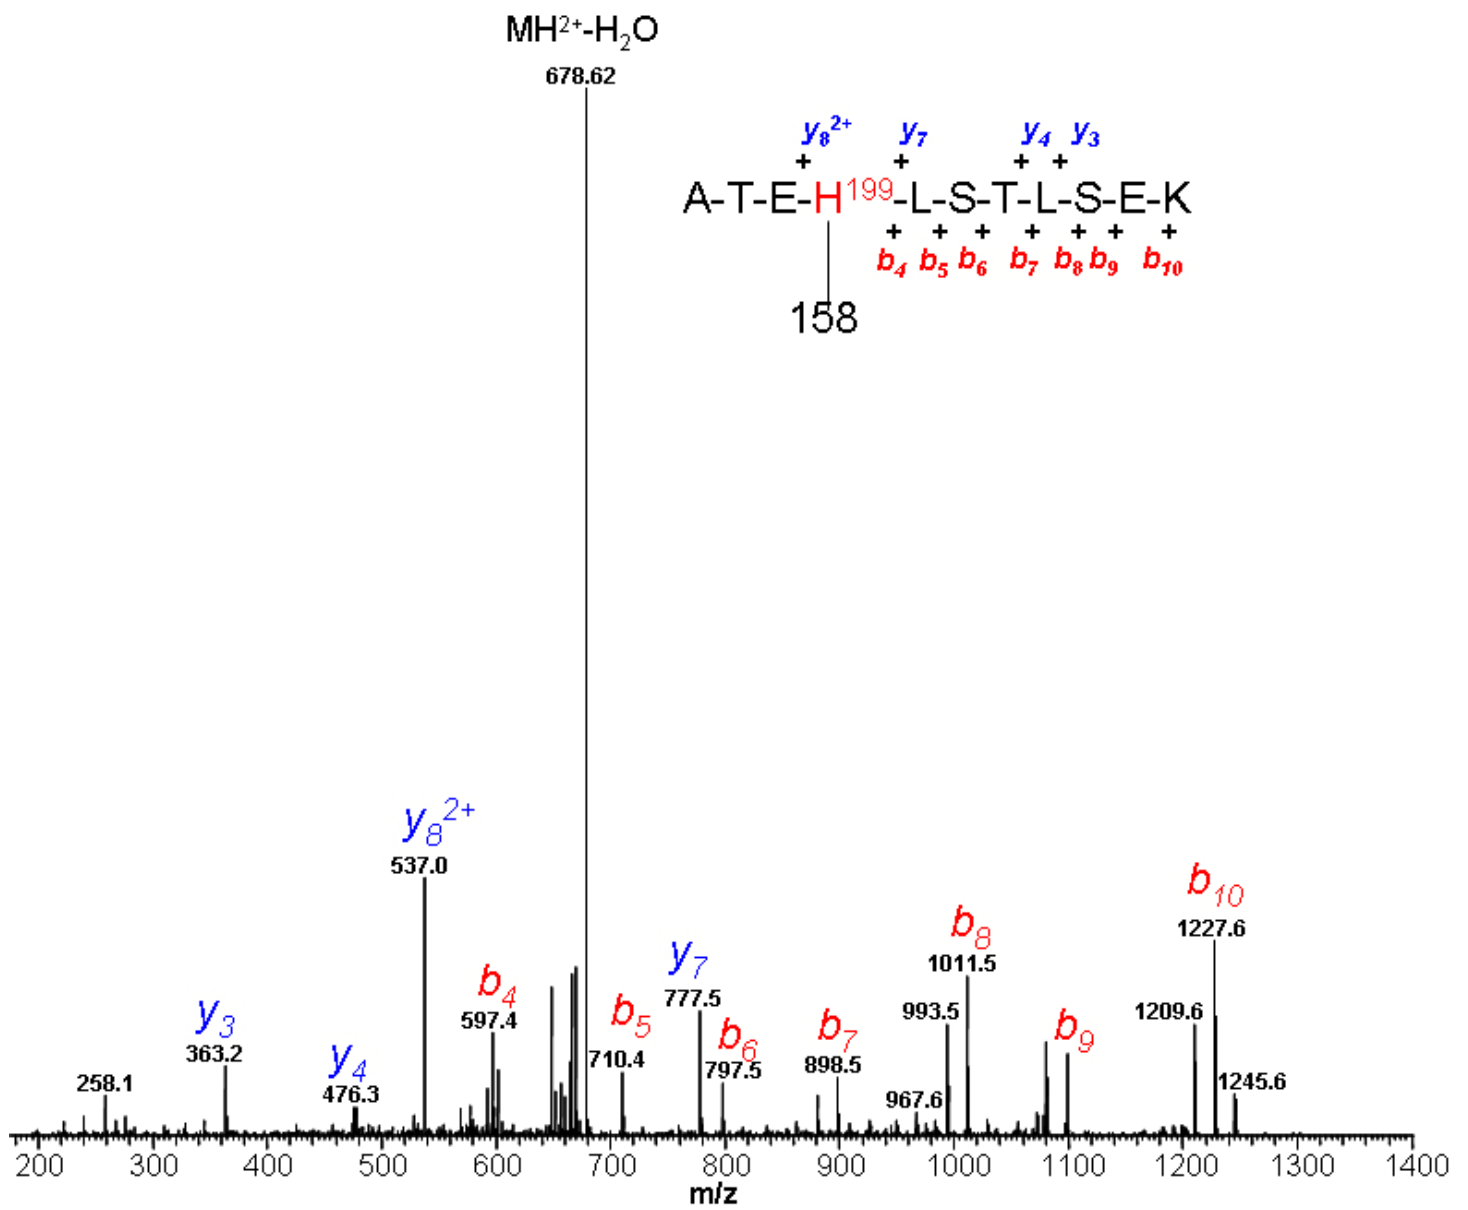

n. HNE (M+158) reduced Michael adduct of ApoA1 peptide A\*K<sup>208</sup>PALEDLR

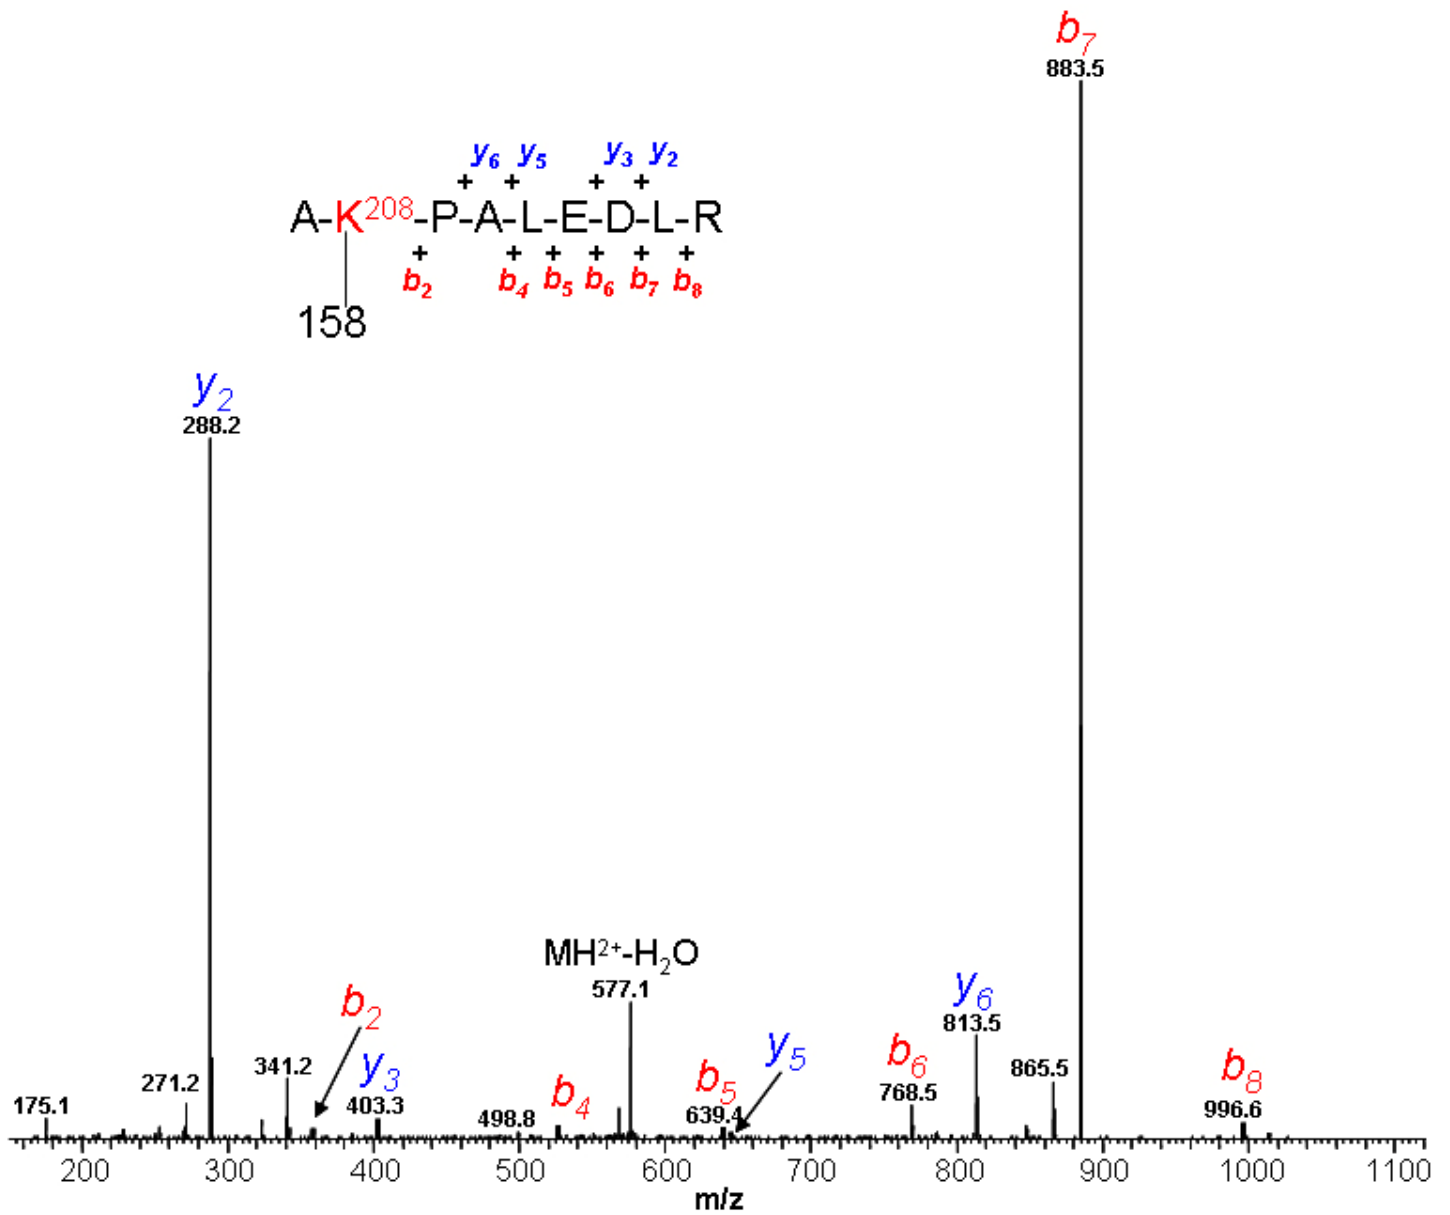

o. HNE (M+158) reduced Michael adduct of ApoA1 peptide VSFLSALEEYT\* $K^{238}$ -K

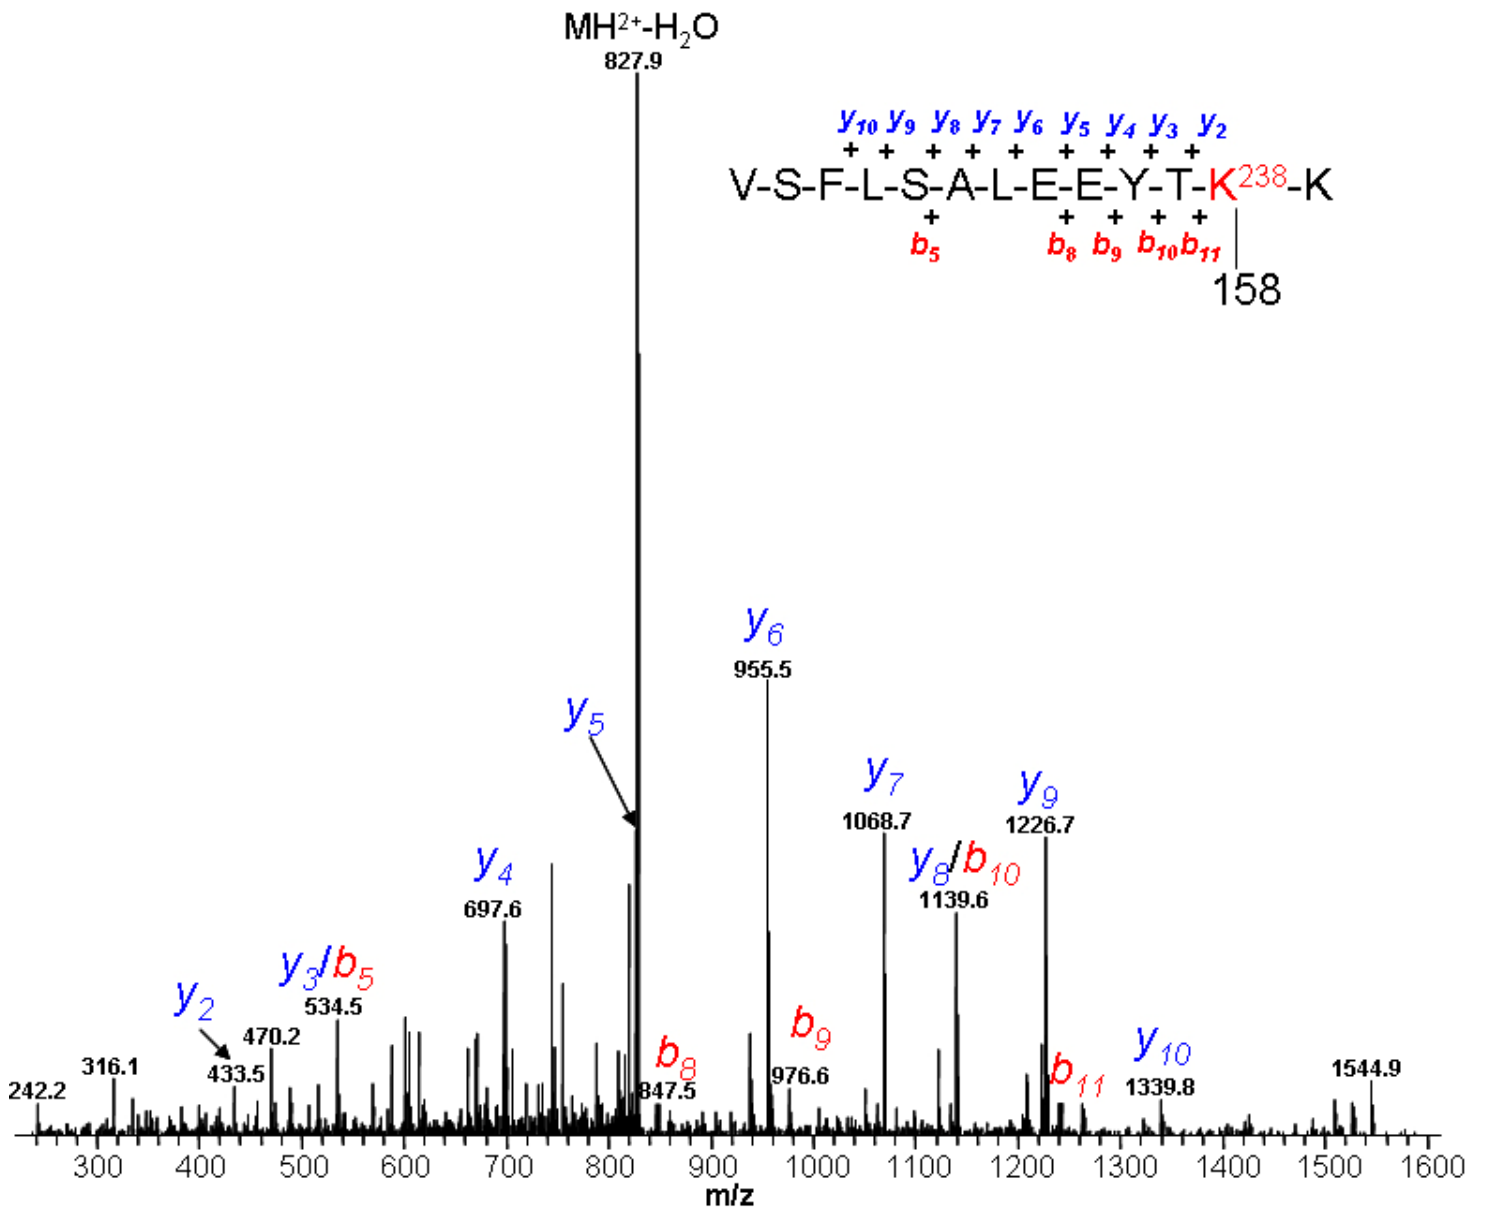

Supplement: pr8001222_si_001.pdf [file pr8001222_si_001.pdf]
